# Supplementary material for: The critical role of surfactants towards CdS nanoparticles: synthesis, stability, optical and PL emission properties
Source: Royal Society of Chemistry journal article supplement (doi:10.1039/c2ra21963h), 2012-12-10
Supplement: c2ra21963h.pdf [file c2ra21963h.pdf]

## SUPPLEMENTARY DATA

### THE CRITICAL ROLE OF SURFACTANTS TOWARDS CdS NANOPARTICLES: SYNTHESIS, STABILITY, OPTICAL AND PL EMISSION PROPERTIES

Sanjay Kumar<sup>1,2</sup>, Michael Gradzielski<sup>3</sup> and S.K. Mehta<sup>1\*</sup>

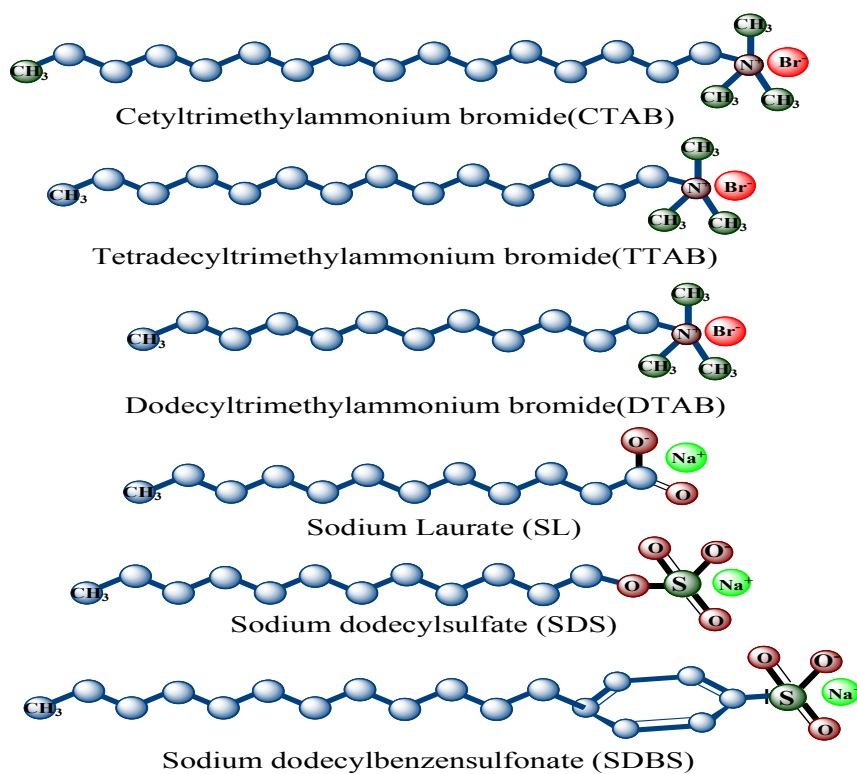

**Fig. S1.** Molecular structures of the cationic and anionic surfactants used in the study

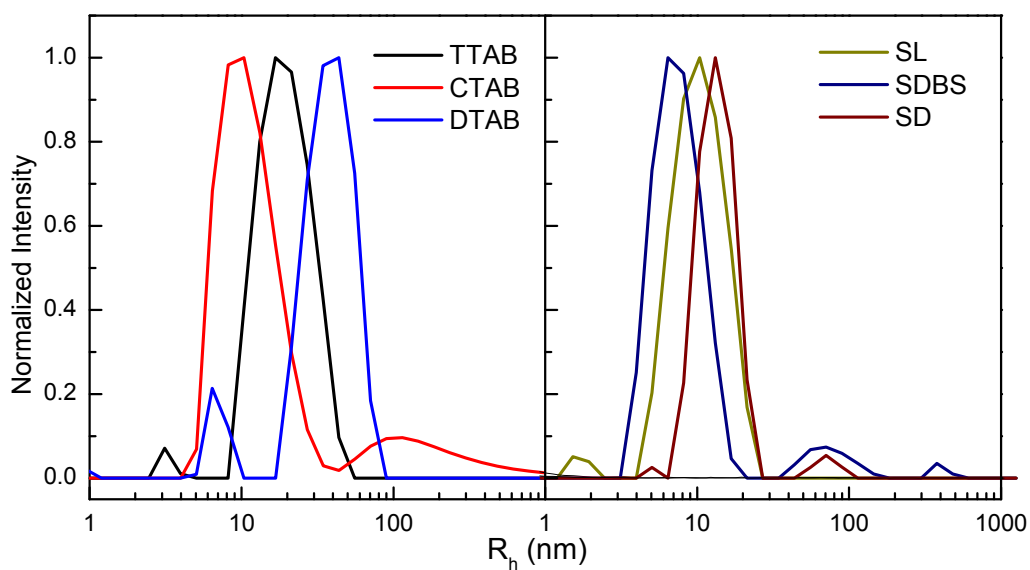

**Figure S2.** Size distribution of CdS NPs stabilized with different surfactants obtained after the CONTIN analysis.

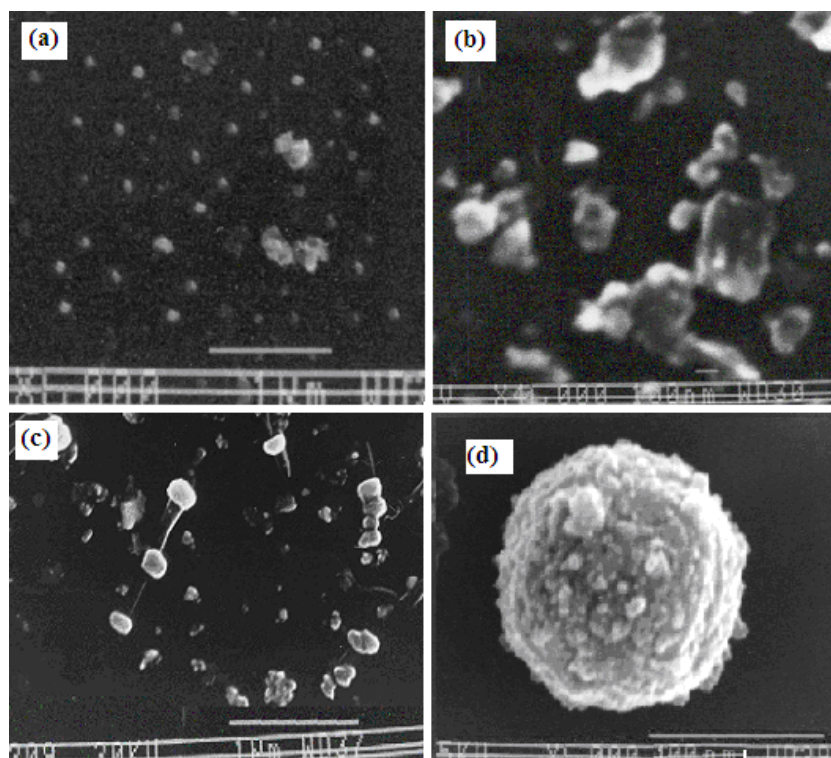

**Figure S3.** SEM images of powdered CdS NPs separated from (a) CTAB; scale bar 1 $\mu$ m, (b) DTAB; scale bar 100 nm, (c) SDBS; scale bar 1 $\mu$ m (d) Magnified view of single NP with scale bar of 100 nm.

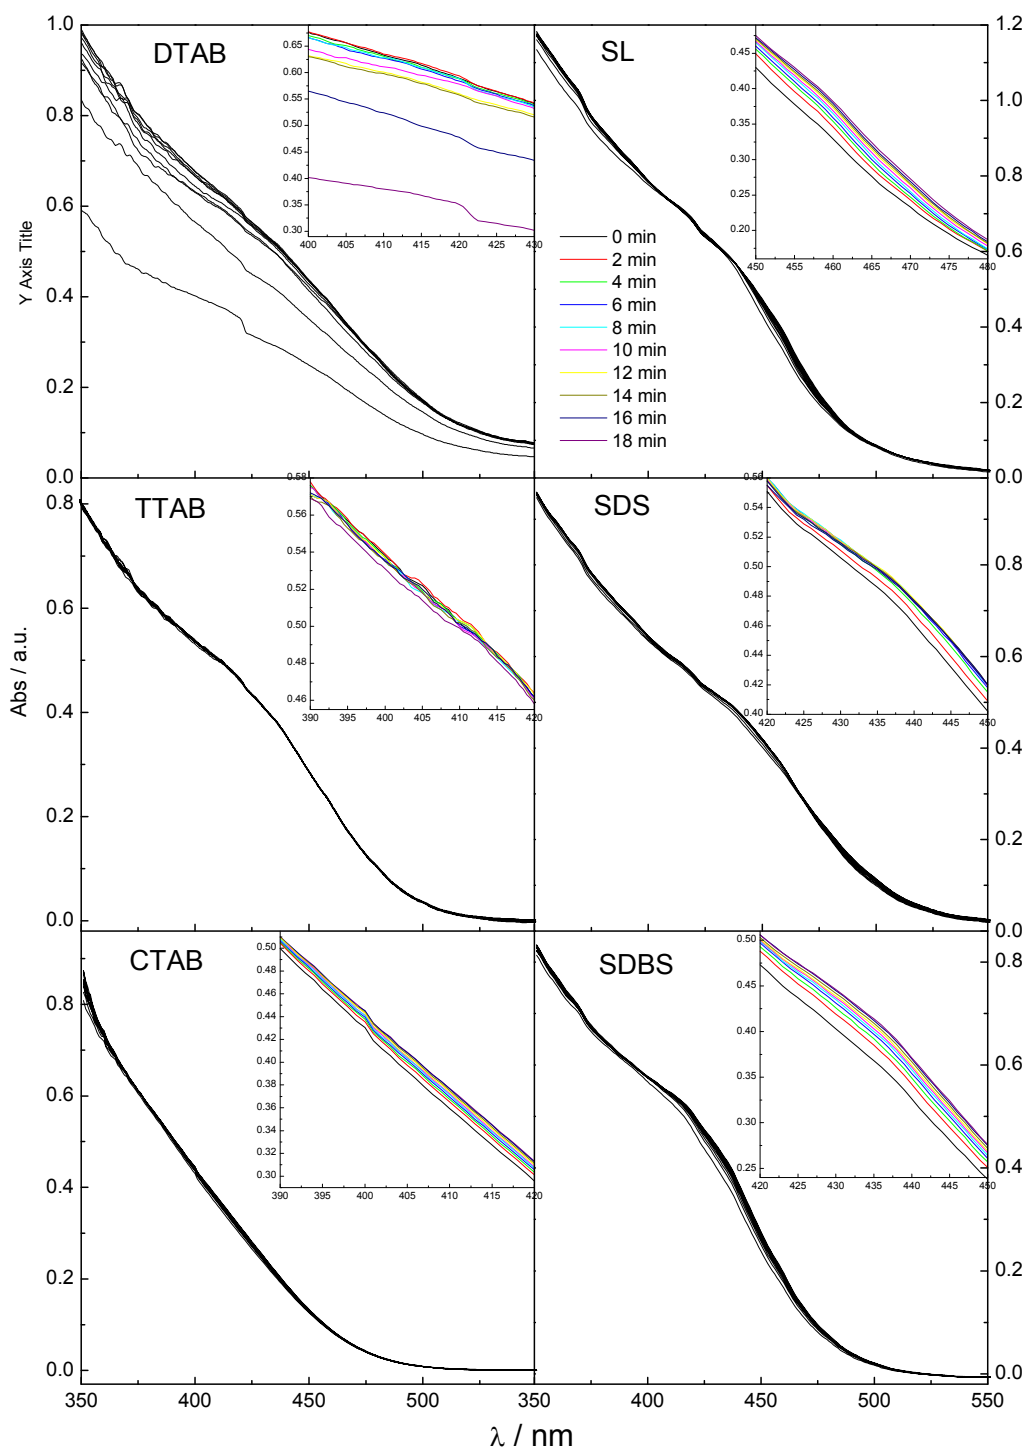

**Figure S4.** Time evolution of UV-vis spectra of CdS NPs stabilized in aqueous solution of various surfactants

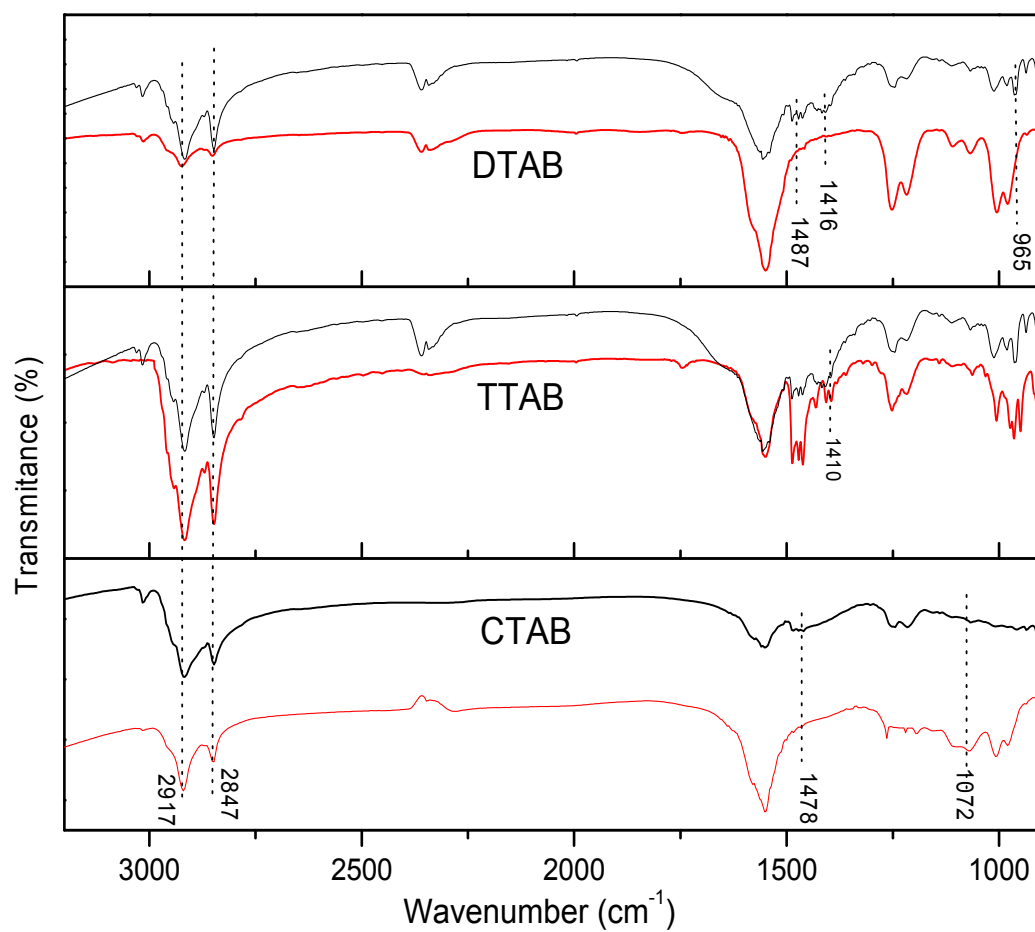

**Fig. S5.** Comparative FTIR spectra of free (black line) and CdS bound (red line) cationic surfactants.

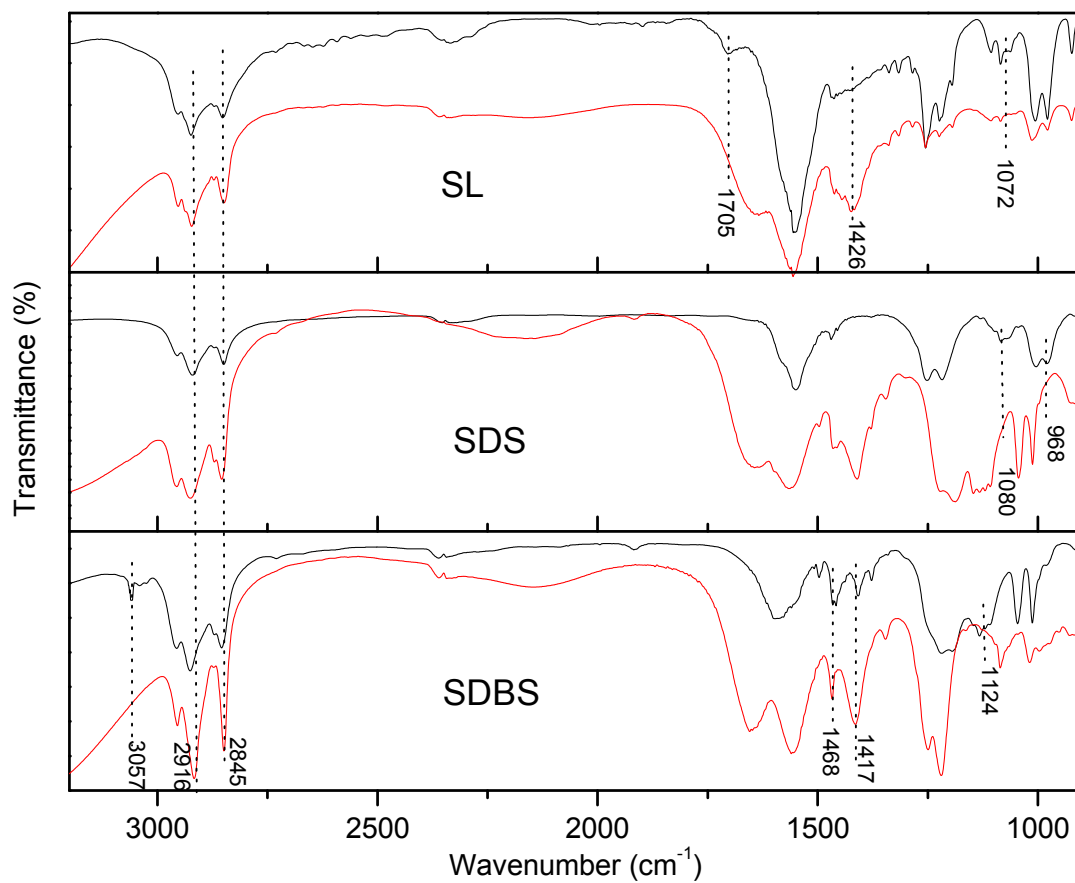

**Fig. S6.** Comparative FTIR spectra of free (black line) and CdS bound (red line) anionic surfactants.

**Table S1.** cmc values of the surfactants

| Surfactant | CTAB      | TTAB      | DTAB     | SL       | SDS       | SDBS      |
|------------|-----------|-----------|----------|----------|-----------|-----------|
| cmc / mM   | 0.92±0.03 | 3.40±0.20 | 15.8±0.2 | 25.1±0.2 | 8.30±0.20 | 1.90±0.20 |
